1                   **Association between hot flashes severity and oxidative stress among Mexican**  
2                                           **postmenopausal women: a cross-sectional study**

3                                           Short title: **Hot flashes severity and oxidative stress**

4  
5 Martha A. Sánchez-Rodríguez<sup>1¶\*</sup>, Mariano Zacarías-Flores<sup>2&</sup>, Alicia Arronte-Rosales<sup>1&</sup>, Víctor  
6 Manuel Mendoza-Núñez<sup>1¶</sup>

7  
8 <sup>1</sup>Unidad de Investigación en Gerontología, Facultad de Estudios Superiores Zaragoza,  
9 Universidad Nacional Autónoma de México, Ciudad de México, México

10  
11 <sup>2</sup>División de Ginecología y Obstetricia, Hospital Gustavo Baz Prada, Instituto de Salud del  
12 Estado de México, Nezahualcoyotl, Estado de México, México.

13  
14  
15 \*Corresponding author  
16 E-mail: [masanrod@yahoo.com.mx](mailto:masanrod@yahoo.com.mx) (MASR)

17  
18  
19  
20 ¶These authors contributed equally to this work.

21  
22 &These authors also contributed equally to this work.

23  
24  
25 **Funding:** The work was supported by Dirección General de Asuntos del Personal Académico,  
26 Universidad Nacional Autónoma de México, grant number DGAPA-PAPIIT IN306517

27  
28

29

30

31

32

33

34

## 35 **Abstract**

36 **Objective:** To assess the association between hot flashes (HFs) severity and oxidative stress (OS)  
37 in Mexican postmenopausal women.

38 **Methods:** A cross-sectional study was carried out with perimenopausal women aged 40-59 years  
39 community-dwelling from Mexico City, Mexico. They participated in Menopause and Oxidative  
40 Stress Project. The baseline sample consisted of 476 women recruited to participate; 161 women  
41 were excluded due to different reasons. Hence, 315 women were selected to establish two groups,  
42 a) 145 premenopausal women (yet with menstrual bleeding), and b) 170 postmenopausal women  
43 (without menses). All women were free of cardiovascular, kidney, hepatic or cancer disease, and  
44 without antioxidant supplement intake for at least six months prior to the beginning of the study;  
45 none had previously received hormone therapy. As OS markers, we measured plasma  
46 malondialdehyde using the TBARS assay, erythrocyte superoxide dismutase (SOD) and  
47 glutathione peroxidase (GPx), uric acid, and total antioxidant status; also, we calculated  
48 SOD/GPx ratio, antioxidant gap and an oxidative stress score ranging from 0 to 7. The HFs were  
49 evaluated using the Menopause Rating Scale. The women completed Spanish version of the  
50 Athens Insomnia Scale, Zung Self-Rating Anxiety Scale and Zung Self-Rating Depression Scale  
51 and a questionnaire of pro-oxidant factors.

52 **Results:** Stress score increased with HFs severity (mild  $2.9 \pm 0.23$ , moderate  $3.1 \pm 0.21$  and severe  
53  $3.8 \pm 0.18$ ,  $p < 0.01$ ) in postmenopausal women. We observed a positive correlation between HFs  
54 severity and stress score,  $r = 0.247$  ( $p = 0.001$ ) in postmenopausal women; other test scores were not  
55 correlated. Severe HFs were a risk factor for OS (OR=3.37, 95%CI: 1.20-9.51,  $p < 0.05$ ) in an  
56 adjusted multivariate analysis by different postmenopausal symptoms and pro-oxidant factors; we  
57 did not see any association in premenopausal women.

58 **Conclusion:** Our findings suggest an association between HFs severity and OS in Mexican  
59 postmenopausal women.

60 **Key words:** oxidative stress, postmenopausal women, hot flashes, malondialdehyde, antioxidant  
61 status.

## 62 **Introduction**

63 Menopause, an expected event in a woman's life, is commonly defined as a 12-month  
64 period of amenorrhea [1] or hypoestrogenism (estrogen level < 25 pg/mL) due to ovarian  
65 senescence; therefore, the postmenopausal period may be considered the beginning of the aging  
66 process in women. Postmenopausal aging is produced by a series of endocrinological changes  
67 that lead to the erratic production of estrogens (mainly estradiol) that eventually bring to low  
68 estrogen (E2) level [2] and is associated with multiple symptoms including vasomotor symptoms  
69 that interfere with daily activities and sleep. The most distressing symptoms of menopausal  
70 transition are hot flashes (HFs). They occur in over 75% of menopausal women [3]. Recently, it  
71 was highlighted that moderate/severe HFs continue, on average, for nearly 5 years after  
72 menopause, and more than one third of women experience moderate/severe HFs 10 years or more  
73 after menopause [4]; however, HFs onset or intensify occurs during the late menopausal  
74 transition [1].

75 The marked reduction in E2 has been shown to increase levels of oxidative stress (OS) in  
76 the body because E2 presents antioxidant properties due to its structure and its capacity to prevent  
77 OS by different ways, such as free-radical scavenger, neutralizing excess reactive oxygen species  
78 (ROS), and increasing antioxidant molecules (e.g. thioredoxin and superoxide dismutase) [5,6];  
79 therefore, E2 is part of the antioxidant system that counteracts OS during reproductive stage.  
80 Additionally, low concentrations of this hormone have pro-oxidant like effects [7]. In this regard,

81 our research group have described that menopause is a risk factor for OS [8] because when the  
82 production of E2 decreases, the antioxidant protection is lost and therefore OS increases.

83 Oxidative stress is also involved in the pathogenesis of menopausal symptoms, such as  
84 vasomotor disturbances (e.g. HFs or night sweats). During menopause transition and  
85 postmenopausal period, the women suffer repeated episodes of such vasomotor disturbances,  
86 which produce an increase of the metabolic rate. These episodes of vasomotor symptoms  
87 contribute to OS production by raising the level of oxidant species and by blocking antioxidants  
88 and their function in neutralizing reactive oxygen/nitrogen species [7].

89 Additionally, the relationship between HFs and OS is little understood; several studies  
90 support an association, but others do not. Recently a report noted that HFs and OS are  
91 independent events [9], causing a controversy; therefore, the aim of this study was to assess the  
92 association between HFs severity and OS in in Mexican postmenopausal women.

## 93 **Material and methods**

### 94 *Study design and population*

95 We carried out a cross-sectional study with a deterministic sample of 315 perimenopausal women  
96 aged 40-59 years community-dwelling from Mexico City, Mexico. They were invited to  
97 participate in Menopause and Oxidative Stress Project directed by the Gerontology Research Unit  
98 at Universidad Nacional Autonoma de Mexico, Zaragoza Campus, from February 2015 to March  
99 2016. The baseline sample consists of 476 women recruited by informative brochures that were  
100 distributed in the community specifying the objectives of the study and the admission criteria;  
101 161 women were excluded due to different reasons (Fig 1). Women included were separated into  
102 two groups, a) 145 premenopausal women (yet with menstrual bleeding), and b) 170  
103 postmenopausal women (without menses). All women were free of overt cardiovascular, kidney,

104 hepatic and cancer disease as assessed by medical history and physical examination and without  
105 antioxidant supplement intake for at least six months prior to the beginning of the study; none  
106 had previously received hormone therapy. The study protocol was approved by the Ethics  
107 Committee of the Universidad Nacional Autonoma de Mexico, Zaragoza Campus, Mexico City,  
108 Mexico (register number FESZ/DEPI/CI/004/17).

109

110 **Fig 1. Diagram of the inclusion of study participants.**

111 The women agreed to participate in the study after signing the informed consent. The  
112 participants underwent the following examinations: complete clinical history, complete blood  
113 count, glucose and lipids profile, anthropometric and blood pressure measurements. Those tests  
114 were used to establish their health status, using the cut-off points of reference values for Mexican  
115 adults [10].

116 We measured E2 level using a radioimmunoassay method (Siemens, Malvern, PA, USA)  
117 and FSH level using a chemiluminescence method (Siemens). The within-run precision level for  
118 these methods were 3.1% and 7.4%, respectively, and the E2 analytical sensitivity was 8 pg/mL.

119 Blood samples were collected after a 12-h fasting period by venipuncture and placed in  
120 vacutainer/siliconized test tubes containing a separating gel and no additives, and heparin as  
121 anticoagulant agent (Becton-Dickinson, Mexico City, Mexico). Samples containing heparin were  
122 analyzed using a hemoglobin test protocol (including hemoglobin, hematocrit, and leukocyte  
123 counts) in a Celly 70 auto analyzer (Chronolab, Mexico City, Mexico). Serum was obtained from  
124 samples without additives and was tested for glucose, cholesterol, triglycerides and high-density  
125 lipoprotein cholesterol (HDL-c) concentrations using a Cobas C111 analyzer (Roche Diagnostics,  
126 Basilea, Sw). The intra- and inter-assay variation coefficients were less 5% in all determinations.

127           After clinical history and physical examination were conducted, we performed the  
128 following anthropometric measurements: weight was measured while the woman was wearing  
129 underwear and a clinical gown and in a fasting state (after evacuation). A Torino® scale (Tecno  
130 Lógica, Mexicana, Mexico, TLM®) was used, and was calibrated before each weight  
131 measurement. Height was obtained with an aluminum cursor stadiometer graduated in  
132 millimeters. The woman stood barefoot, back, and head in contact with the stadiometer in  
133 Frankfurt horizontal plane. Body mass index (BMI) was calculated by dividing weight (in  
134 kilograms) through squared height (in meters).

135           Blood pressure was measured in both arms 3 times in the morning, in a fasting condition,  
136 in sitting position. A mercurial manometer was used to measure the blood pressure and it was  
137 taken by medical technicians who had attended training sessions to standardize the procedures.  
138 The technicians were supervised to avoid possible biases in measurement.

#### 139 *Assessment of oxidative stress*

140           With the blood samples containing heparin, we measured red blood cell superoxide  
141 dismutase (SOD) and glutathione peroxidase (GPx) activities, plasma total antioxidant status  
142 (TAS), and plasma malondialdehyde level (MDA). All the methods were validated in our  
143 research laboratory, and the within-run precision for the markers were as follows: 3.8%, 4.6%,  
144 4.3%, and 6%. Artefactual formation of thiobarbituric acid reacting substances (TBARS) in the  
145 samples was prevented by adding 10 µL of 2 mM butylated hydroxytoluene in ethanol at 95%  
146 immediately after centrifugation.

147           SOD activity was measured by the method that employs xanthine and xanthine oxidase to  
148 generate superoxide radicals, which react with 2-(4-iodophenyl)-3-(4-nitrophenol)-5-  
149 phenyltetrazolium chloride to form a red formazan dye (Randox Laboratories, Ltd., Crumlin Co.

150 UK). GPx was measured using the oxidation of glutathione by cumene hydroperoxide in the  
151 presence of glutathione reductase and NADPH, oxidized glutathione is immediately converted  
152 into the reduced form with the subsequent oxidation of NADPH to NADP<sup>+</sup> (Randox  
153 Laboratories, Ltd.). Antioxidant status (TAS) quantification was conducted using 2,2-azino-bis  
154 (3-ethylbenzthiazoline-6-sulfonic acid, ABTS<sup>+</sup>) radical formation kinetics (Randox Laboratories  
155 Ltd.). The MDA level was measured with TBARS assay, which was performed as described by  
156 Jentzsch et al.<sup>11</sup>, and as we previously validated. All the measures were performed in a Shimadzu  
157 UV-1601 UV-Vis spectrophotometer (Kyoto, Japan).

158 Uric acid level was measured by uricase colorimetric method and albumin level by  
159 bromocresol green technique with a Cobas C111 analyzer.

160 In addition, we calculated the antioxidant gap (GAP) with the equation  $GAP = TAS -$   
161  $[(\text{albumin } (\mu\text{mol}) \times 0.69) + \text{uric acid } (\mu\text{mol})]$  [12]

162 Also, we obtained the SOD/GPx ratio, a proposal from some authors that indicates  
163 oxidative damage because the enzymatic antioxidant pathway is a two-step process. In first step,  
164 SOD converts superoxide anion to hydrogen peroxide, a strong oxidant; and in the second-step  
165 glutathione peroxidase converts hydrogen peroxide to water. Thus, when there is an imbalance  
166 between the first and second-step, an accumulation of hydrogen peroxide is produced which  
167 affects the cellular functions and may be lead to organic dysfunction [13-15].

168 Alternative cut-off values of each parameter were defined based on the 90<sup>th</sup> percentile of  
169 young healthy subjects:  $MDA \geq 0.320 \mu\text{mol/L}$ ,  $SOD \leq 1.20 \text{ U/gHb}$ ,  $GPx \leq 50.1 \text{ U/gHb}$ ,  $TAS \leq$   
170  $900 \mu\text{mol/L}$ ,  $SOD/GPx \geq 0.023$ ,  $GAP \leq 190 \mu\text{mol/L}$ . The uric acid cut-off value was the median  
171 of the reference interval ( $> 268 \mu\text{mol/L}$ ) as determined at the Gerontologic Clinical Research  
172 Laboratory of the Universidad Nacional Autónoma de México (UNAM) Zaragoza Campus in

173 Mexico City [10]. An oxidative stress score (SS) was obtained, ranging from 0 to 7, represented  
174 the severity of the marker modifications; a score of 1 was given to each value higher or lower  
175 than the cut-off point established. A cut-off value of  $\geq 4$  was considered as OS.

176 *Assessment of hot flashes, symptomatology linked to menopausal transition and pro-oxidant*  
177 *lifestyle factors*

178 As potential confounding factors were considered mood disturbances, insomnia and pro-  
179 oxidant lifestyle aspects. All the women completed Spanish versions of self-assessment tests and  
180 a structured questionnaire about pro-oxidant factors.

181 Menopausal symptoms were assessed with the Menopause Rating Scale (MRS), a  
182 validated test to assess the intensity from them [16,17]. The test is composed by 11 items  
183 assessing menopausal symptoms divided into three subscales: somatic, psychological and  
184 urogenital [18]. Each item can be graded by the subject from 0 (not present) to 4 (1 = mild; 2 =  
185 moderate; 3 = severe; 4 = very severe). We used the question about vasomotor symptoms of  
186 somatic subscale to assess HFs intensity and strengthen the concepts pictorially.

187 Anxiety was evaluated with Zung Self-Rating Anxiety Scale (SAS). The SAS is a 20-item  
188 measure developed to assess the frequency of anxiety symptoms based on diagnostic  
189 conceptualizations. The total scores on the SAS ranged from 0 to 80. A cut-off value  $>45$  was  
190 considered to indicate anxiety [19,20].

191 For depressive mood, we used the Zung Self-Rating Depression Scale (SDS) that consists  
192 of 20 items. The score ranges from 20 to 80. A woman with a SDS score below 40 was  
193 considered normal [21,22].

194 We used the Athens Insomnia Scale (AIS) to evaluate sleep disturbances. The AIS is a  
195 validated self-assessment psychometric instrument designed to determine sleep difficulty based



196 on the ICD-10 criteria. It consists of eight items and the higher the score, the greater intensity of  
197 sleep disturbances. A cut-off value of  $\geq 8$  was considered as insomnia [23,24].

198 About lifestyle pro-oxidant factors, the participants answered a structured questionnaire  
199 assessing the following: smoking, the consumption of caffeinated and/or alcoholic beverages, and  
200 physical inactivity. We considered a pro-oxidant factor present when the following were noted:  
201 smoking  $\geq 2$  cigarettes/day, consumption of  $\geq 2$  glasses/day alcoholic beverages, consumption of  
202  $> 2$  cups/day caffeinated beverages, and  $< 30$  min/day of physical activity.

### 203 *Statistical analysis*

204 Quantitative results were described with the means  $\pm$  standard error (SE), and they were  
205 compared using two sample t-test. We separated the women in three subgroups for each group  
206 per the HFs intensity: 1) no/mild ( $< 2$ ), 2) moderate ( $= 2$ ), and 3) severe/very severe ( $\geq 3$ ), and we  
207 compared with one-way ANOVA with Dunnett test as *posthoc*, using subgroup 1 as control.  
208 Categorical data were analyzed using frequencies, percentages and 95% confidence interval  
209 (95%CI) for proportions, which were compared using the chi square test. Also, we calculated  
210 Spearman's correlation between SS and HFs intensity or other tests scores, for each group. Three  
211 logistic regression models, with the enter method, were generated according to different  
212 confounding factors, using categorical OS (SS cut-off value  $\geq 4$ ) as dependent variable. In all  
213 models, we included HFs as no/mild, moderate and severe/very severe, and the other variables as  
214 dummy. The first model was unadjusted, only HFs severity was included as independent  
215 variable; in the second model, we added anxiety (score  $> 45$ ), depressive mood (score  $\geq 40$ ) and  
216 insomnia (score  $\geq 8$ ) as confounding pro-oxidant symptoms. Finally, to simultaneously control  
217 the risk factors for OS, we incorporated the following variables at the second model: age ( $\geq 50$  y),  
218 smoker ( $> 2$  cigarettes/d), caffeinated beverages intake ( $> 2$  cups/d), sedentary ( $< 30$  min/d of  
219 physical activity); alcohol intake was not included because the frequency in the groups was very

220 low, and obesity was not added because its frequency was very high. The models were built using  
221 the variables identified in the literature as potential pro-oxidant factors associated with OS.  
222 Interactions among pro-oxidant variables were not important to the models. With the odds ratio  
223 (OR) results, we calculated chi square for trends. Risk factors were defined by  $OR > 1$  and a  
224 95%CI that did not include the 1.0 value. A  $p$ -value  $< 0.05$  was considered significant. The data  
225 were processed using the standard statistical software package SPSS V. 20.0 (IBM SPSS  
226 Statistics Armonk, NY, USA).

## 227 **Results**

### 228 *Sample characteristics*

229 A total of 315 women separated in two groups (145 premenopausal and 170  
230 postmenopausal) were included in the study, from a baseline sample of 476 women recruited.  
231 Seventy-three (50%) premenopausal women reported mild to moderate hot flashes vs. 112 (66%)  
232 postmenopausal women that indicated moderate to severe hot flashes ( $p < 0.01$ ). The biochemical-  
233 hematologic parameters, anthropometric and blood pressure measurements in both groups had  
234 similar values in all parameters, except in red blood parameters and cholesterol ( $p < 0.0001$ ). Of  
235 the analyzed symptoms, insomnia was more frequent in postmenopausal women than in  
236 premenopausal women ( $p < 0.05$ ); psychological alterations were not different between the  
237 groups. Frequency in the pro-oxidant factors was similar, except that more premenopausal  
238 women were smokers (Table 1).

239

240

241

242

243 **Table 1. Descriptive characteristics of study groups.**

| Characteristic                             | Premenopausal women | Postmenopausal women           |
|--------------------------------------------|---------------------|--------------------------------|
|                                            | (n = 145)           | (n = 170)                      |
| Age (y)                                    | 47.1 ± 0.3          | 52.9 ± 0.3 <sup>a</sup>        |
| Estrogen (pg/mL)                           | 94.3 ± 6.3          | 10.1 ± 0.5 <sup>a</sup>        |
| FSH (mU/mL)                                | 17.0 ± 1.6          | 57.5 ± 2.0 <sup>a</sup>        |
| Hemoglobin (mmol/L)                        | 8.3 ± 0.07          | 9.0 ± 0.06 <sup>a</sup>        |
| Hematocrit (%)                             | 42.8 ± 0.29         | 43.9 ± 0.30 <sup>b</sup>       |
| Glucose (mmol/L)                           | 5.27 ± 0.13         | 5.38 ± 0.13                    |
| Cholesterol (mmol/L)                       | 5.28 ± 0.08         | 5.77 ± 0.09 <sup>a</sup>       |
| Triglyceride (mmol/L)                      | 2.09 ± 0.12         | 2.15 ± 0.11                    |
| HDL-c (mmol/L)                             | 1.42 ± 0.03         | 1.48 ± 0.03                    |
| Systolic tension (mm Hg)                   | 122 ± 1.4           | 125 ± 1.2                      |
| Diastolic tension (mm Hg)                  | 82 ± 0.9            | 84 ± 0.7                       |
| Body mass index (kg/m <sup>2</sup> )       | 29.72 ± 0.7         | 29.52 ± 0.4                    |
| Anxiety                                    | 38 (26%, 19-33%)    | 55 (32%, 25-39%)               |
| Depressive mood                            | 35 (24%, 17-31%)    | 51 (30%, 23-37%)               |
| Insomnia                                   | 74 (51%, 43-59%)    | 110 (65%, 58-72%) <sup>c</sup> |
| Smokers (> 2 cigarettes/d)                 | 28 (19%, 13-25%)    | 15 (9%, 5-13%) <sup>c</sup>    |
| Caffeinated beverages intake (> 2 cups/d)  | 49 (34%, 26-42%)    | 48 (28%, 21-35%)               |
| Alcohol intake (> 2 glasses/d)             | 7 (5%, 1-9%)        | 7 (4%, 1-7%)                   |
| Sedentary (<30 min/d of physical activity) | 90 (62%, 58-66%)    | 99 (58%, 51-65%)               |

244 Quantitative data show means ± standard error; categorical data show frequency, percentage and

245 95% confidence interval. Two sample t-test, <sup>a</sup>*p* < 0.0001, <sup>b</sup>*p* = 0.01; <sup>c</sup>chi square test, *p* < 0.05. FSH:

246 Follicle stimulating hormone, HDL-c: high-density lipoprotein cholesterol.

247

248

249 *Oxidative stress and hot flashes*

250           Among OS markers, MDA level was higher in postmenopausal women with severe HFs  
251 compared to women with mild HFs ( $p < 0.01$ ), and SOD activity was lower ( $p < 0.05$ ) when HFs  
252 intensity increase in this group. In premenopausal women, the markers did not show any change  
253 with HFs severity. Additionally, we used an oxidative stress score (SS) that integrates both  
254 oxidized and antioxidant markers to represent the dynamics of OS. This index included MDA  
255 level and SOD/GPx ratio as oxidative damage markers, two antioxidant enzymes (SOD and  
256 GPx), and three plasma antioxidant components (TAS, GAP and uric acid), this to evaluate  
257 integrally the OS. In this context, we found that SS was increased with HFs severity (mild  $2.9 \pm$   
258  $0.23$ , moderate  $3.1 \pm 0.21$  and severe  $3.8 \pm 0.18$ ,  $p < 0.01$ ) in postmenopausal women; in  
259 premenopausal women, the index did not change (Table 2).

260

261

262

263

264

265

266

267

268

269

270

271

272

273 **Table 2. Oxidative stress markers by hot flashes intensity in study groups.**

| Hot flashes intensity             | Premenopausal women |                      |                    | Postmenopausal women |                      |                            |
|-----------------------------------|---------------------|----------------------|--------------------|----------------------|----------------------|----------------------------|
|                                   | Mild<br>(n = 80)    | Moderate<br>(n = 39) | Severe<br>(n = 26) | Mild<br>(n = 58)     | Moderate<br>(n = 52) | Severe<br>(n = 60)         |
| <b>Oxidative stress markers</b>   |                     |                      |                    |                      |                      |                            |
| Malondialdehyde (μmol/L)          | 0.333 ± 0.006       | 0.333 ± 0.010        | 0.325 ± 0.013      | 0.333 ± 0.007        | 0.351 ± 0.008        | 0.367 ± 0.008 <sup>a</sup> |
| SOD/GPx ratio                     | 0.023 ± 0.001       | 0.024 ± 0.002        | 0.022 ± 0.002      | 0.024 ± 0.001        | 0.026 ± 0.003        | 0.024 ± 0.001              |
| Superoxide dismutase (U/g Hb)     | 1.26 ± 0.017        | 1.21 ± 0.022         | 1.21 ± 0.029       | 1.22 ± 0.023         | 1.21 ± 0.016         | 1.15 ± 0.014 <sup>b</sup>  |
| Glutathione peroxidase (U/g Hb)   | 60.2 ± 2.15         | 55.1 ± 2.68          | 58.9 ± 2.57        | 55.1 ± 1.97          | 54.5 ± 2.05          | 51.5 ± 1.76                |
| Uric acid (μmol/L)                | 258 ± 7.4           | 283 ± 13.0           | 264 ± 17.1         | 263 ± 9.6            | 281 ± 10.3           | 279 ± 9.9                  |
| Total antioxidant status (μmol/L) | 1075 ± 24.3         | 1146 ± 36.1          | 1157 ± 46.5        | 1106 ± 32.0          | 1169 ± 28.2          | 1120 ± 29.0                |
| Antioxidant gap (μmol/L)          | 402 ± 22.9          | 436 ± 35.9           | 509 ± 47.1         | 417 ± 32.6           | 461 ± 28.2           | 394 ± 28.6                 |
| Oxidative stress score            | 2.6 ± 0.18          | 3.2 ± 0.28           | 2.4 ± 0.27         | 2.9 ± 0.23           | 3.0 ± 0.21           | 3.8 ± 0.18 <sup>a</sup>    |

274 Data show means ± standard error. Hot flashes intensity: mild (< 2), moderate (= 2), severe (≥ 3). One-way ANOVA with Dunnett test

275 as *posthoc* using mild hot flashes subgroup as control, <sup>a</sup>*p*< 0.01, <sup>b</sup>*p*< 0.05.

276

277 In the univariate analyses between SS and HFs severity or each menopausal symptom  
278 measured by the applied test scores, we found a better correlation between SS and HFs intensity  
279 ( $r = 0.247$ ,  $p = 0.001$ ) in postmenopausal women; other menopausal symptoms were not  
280 significant. In premenopausal women, we did not see any relationship (Table 3).

281  
282 **Table 3. Relationship between stress score and menopausal symptoms scores in study**  
283 **groups.**

| Scale                        | Premenopausal women<br>(n = 145) |                      | Postmenopausal women<br>(n = 170) |                      |
|------------------------------|----------------------------------|----------------------|-----------------------------------|----------------------|
|                              | r                                | p value <sup>a</sup> | r                                 | p value <sup>a</sup> |
| <b>Hot flashes intensity</b> | 0.087                            | 0.298                | 0.247                             | 0.001                |
| <b>MRS score</b>             | 0.029                            | 0.730                | 0.148                             | 0.054                |
| <b>AIS score</b>             | 0.052                            | 0.543                | 0.062                             | 0.431                |
| <b>SAS score</b>             | 0.117                            | 0.169                | 0.059                             | 0.457                |
| <b>SDS score</b>             | 0.045                            | 0.598                | 0.053                             | 0.508                |

284 <sup>a</sup>Spearman correlation. SDS: Zung Self-Rating Depression Scale; MRS: Menopause Rating  
285 Scale; AIS: Athens Insomnia Scale; SAS: Zung Self-Rating Anxiety Scale.

286  
287 Furthermore, we built several logistic models that included HFs intensity, menopausal  
288 symptoms and lifestyle pro-oxidant factors. We found significant models for postmenopausal  
289 women (Table 4). Accordingly, we observed a gradual increment of risk for OS in  
290 postmenopausal women with severe HFs when we included pro-oxidant factors; thus, when the  
291 model was unadjusted, OR = 2.54 (95% CI: 1.20-5.39), and when we incorporated both,  
292 menopausal symptoms and lifestyle pro-oxidant factors as categorical variables, the risk  
293 increased to 3.37 (95% CI: 1.20-9.51)

294 **Table 4. Odds ratio to present different intensities of hot flashes according to oxidative stress and pro-oxidant factors in**  
 295 **postmenopausal women.**

| Hot flashes intensity <sup>a</sup> | OR (95% confidence interval) |                            |                               |
|------------------------------------|------------------------------|----------------------------|-------------------------------|
|                                    | Mild (< 2)<br>(n = 58)       | Moderate (= 2)<br>(n = 52) | Severe (≥ 3)<br>(n = 60)      |
| <b>Oxidative stress (SS ≥ 4)</b>   | 18 (31%)                     | 18 (35%)                   | 32 (53%)                      |
| <b>Model<sup>b</sup></b>           |                              |                            |                               |
| <b>A</b>                           | 1.00                         | 1.18 (0.53-2.61)           | 2.54 (1.20-5.39) <sup>c</sup> |
| <b>B</b>                           | 1.00                         | 1.62 (0.69-3.83)           | 3.33 (1.35-8.21) <sup>d</sup> |
| <b>C</b>                           | 1.00                         | 1.51 (0.57-3.95)           | 3.37 (1.20-9.51) <sup>e</sup> |

296 SS: stress score.

297 <sup>a</sup> According MRS scale.

298 <sup>b</sup> Models included following baseline variables:

299 A. Unadjusted model included hot flashes severity and oxidative stress score ≥ 4. Significance of the model  $p= 0.03$ ; <sup>c</sup> chi square for  
 300 trend  $p= 0.01$ .

301 B. Adjusted for: anxiety (score > 45), depressive mood (score ≥ 40) and insomnia (score ≥ 8). Neither of the symptoms were  
 302 significant for the model. <sup>d</sup> Significance into the model  $p< 0.01$ .

303 C. Add to B model the pro-oxidant factors: age (≥ 50 y), smoker (> 2 cigarettes/d), caffeinated beverages intake (> 2 cups/d), and  
 304 sedentary (< 30 min/d of physical activity). Neither of the pro-oxidant factors were significant for the model. <sup>e</sup> Significance into the  
 305 model  $p< 0.05$ .

## 306 **Discussion**

307 Hot flashes are the most prevalent and bothersome symptoms reported by women during  
308 the menopausal transition; recently it was noted that up to 80% of women experience HFs during  
309 this period and that on average, symptoms persist at least 5 years [4]. HFs intensity increase  
310 around perimenopause and is high in the postmenopausal period [4,25]. As we observed in this  
311 study, postmenopausal women referred more discomfort due to HFs because their vasomotor  
312 sensations were moderate to severe, contrary to premenopausal women; however, the prevalence  
313 of moderate/severe HFs in our study was higher than the Penn Ovarian Aging Study cohort [4]  
314 and other study [26] (66% vs. 46% and 40%), this difference may be due to the cross-sectional  
315 design of our study and the way of collecting the data; moreover, the populations are different  
316 and the HFs are dependent on several factors such as genetic, diet, physical changes, cultural  
317 influences, and individual experiences and expectations [27].

318 Furthermore, HFs have been consistently shown to be associated with discomfort, sleep  
319 disturbances, fatigue, mood disturbances and deficient quality of life [25,28], all pro-oxidant  
320 factors that cause OS. Oxidative stress occurs when the balance between ROS, produced by the  
321 metabolism, and antioxidants is disrupted, causing an accumulation of reactive species or the  
322 depletion of antioxidants [29,30]; this imbalance can cause severe oxidative damage in cells, and  
323 it is related to several chronic diseases that frequently are associated to aging, as well as HFs  
324 have been linked to cardiovascular disease, osteoporosis and cognitive decline [27]. In fact,  
325 vasomotor symptoms are associated with an increase in carotid intima–media thickness and other  
326 vascular changes, which causes vascular dysfunction and activation of pathways that increase the  
327 production of ROS and promote OS [31-33].



328           Additionally, OS is increased in the postmenopausal period probably due to the decrease  
329   in estrogen level, a natural antioxidant, by different biochemical mechanisms. Moreover, we  
330   previously noted that menopause is a risk factor for OS, which may be due to an estrogenic  
331   deficiency and symptomatology severity [8]; thus, in this study we explored which of the  
332   symptoms may be the cause of OS, and we focused on HFs because it is the onset of all  
333   disturbances.

334           In this sense, we observed that MDA level was higher and SOD activity was lower, as  
335   individual markers, and SS was higher, all in postmenopausal women with severe HFs, showing  
336   high OS in these women. Although there are few references that analyze the relationship between  
337   HFs and OS, our results are similar to a study in which postmenopausal women with HFs had a  
338   high lipoperoxide level (MDA) and low total antioxidant status compared to women without HFs  
339   [34]; and other research that showed a markedly reduced antioxidant defense in women with  
340   vasomotor symptoms [35], probably because E2 can stimulate cellular antioxidant enzymes  
341   [6,36], and this capacity is lost in the postmenopausal period. However, recently a research was  
342   conducted to evaluate the association between HFs and OS markers in middle-aged women; this  
343   study indicated that none of the peripheral markers examined were found to be significantly  
344   associated to the presence of HFs [9], contrary to our results. A possible explanation to these  
345   controversial results is that the authors used urinary 8-iso-prostaglandin F2 $\alpha$  and 8-OH-deoxy-2'-  
346   guanosine level as oxidative damage markers and different antioxidant components, and in our  
347   study, we used an index to integrally assess OS that includes both, oxidized and antioxidant  
348   components. Although some oxidative damage markers are used to evaluate OS, such as 4-HNE  
349   and isoprostanes, the measurement of antioxidant markers has not always been consistent,

350 therefore, our research group had proposed an index to integrate both processes. This index has  
351 been used in different studies and shown to be useful for measuring OS [37-39].

352 Besides, it is known that the psycho-neuro-endocrine change and vasomotor symptoms  
353 during menopausal transition affect self-esteem, mood states and therefore quality of life [40,41].  
354 Furthermore, depressive mood, anxiety and insomnia are considered pro-oxidant factors as well  
355 as the severe discomfort felt, and these factors can increase OS [8,39,42,43]. Therefore, we  
356 analyze a possible correlation between SS and menopausal symptoms scores to assess which  
357 alteration was related with OS. We found a positive correlation with HFs severity in  
358 postmenopausal women, but the other symptoms tested did not show any relationship; and these  
359 women with severe HFs had two-fold more risk for OS compared to women with mild HFs, even  
360 after controlling for menopausal symptoms and pro-oxidant factors. In this sense, although there  
361 are inconsistencies in the reports about the relationship between HFs and OS, our results showed  
362 that postmenopausal women with severe HFs have a high risk for OS.

363 In the physiology of HFs, the sweat and vasodilation produced by the process are  
364 controlled by the thermoregulatory nucleus, located in the preoptic area of the hypothalamus,  
365 which regulates core body temperature to maintain a homeostatic range (thermoregulatory zone).  
366 This thermoregulatory zone is narrow in postmenopausal women; therefore, small increases in  
367 core body temperature can trigger HFs [3,44]. The thermoregulatory zone is controlled by a  
368 complex neuroendocrine pathway that can produce an increment of norepinephrine and serotonin  
369 that causes changes in the thermoregulatory nucleus, diminishing the set point and increasing the  
370 probability of HFs [45]. The rapid degradation of these monoamine neurotransmitters is  
371 fundamental for the correct synaptic neurotransmission, but it is also a reaction that involves the  
372 enzyme monoamine oxidase (MAO), which generates several products, such as hydrogen  
373 peroxide, that are potentially neurotoxic and can trigger the production of ROS and induce

374 mitochondrial damage and neuronal apoptosis, increasing the OS [46]. Additionally, in the  
375 setting of OS, catecholamines are oxidatively converted to different molecules that are potentially  
376 oxidants, which may further develop an environment of OS. An OS environment leads eventually  
377 to cytotoxic responses and altered cellular function, producing neuronal degeneration [47]. Thus,  
378 the women with severe HFs are in a constant oxidative challenge without the protection of  
379 estrogen as the main antioxidant mechanism at both cerebral and systemic level, since the women  
380 have estrogen receptors in many cells of the body [6], which probably increases their OS.

381         It is necessary to consider several limitations of this study. Initially, we do not include  
382 some pro-oxidant factors such as certain types of food in the diet and the cooking style, but all  
383 the participants had similar lifestyles and socioeconomic level, therefore we supposed similar  
384 feeding habits; besides we considered the main pro-oxidant factors in the analysis. Other  
385 limitations are study design, which can be used to explore the associations between HFs and OS  
386 but is unable to establish a causal conclusion, and the sample size. Even so, the sample size that  
387 allowed us to achieve similar subgroups size when we stratified by HFs severity in  
388 postmenopausal women, the use of an integral OS index and the control of potential confounders  
389 in the multivariate logistic models, are aspects that strengthen the study.

390         In conclusion, among Mexican postmenopausal women there is an association between  
391 HFs severity and OS; however, longitudinal studies or controlled clinical trials must be carried  
392 out to confirm our findings.

393 **Author contributions:** MASR conceived the study, completed statistical analyses and  
394 interpretation of data, and drafted the manuscript. MZF conceived the study and contributed to  
395 the interpretation of data. AAR collected and interpreted the data. VMMN contributed to the  
396 discussion and revised the manuscript. All authors read and approved the final manuscript.

397

## 398 **References**

- 399 1. Soules MR, Sherman S, Parrott E, Rebar R, Santoro N, Utian W, et al. Executive summary:  
400 Stages of Reproductive Aging Workshop (STRAW) Park City, Utah, July, 2001.  
401 Menopause. 2001;8:402-407.
- 402 2. Broekmans FJ, Soules MR, Fauser BC. Ovarian aging: mechanisms and clinical  
403 consequences. *Endocrin Rev.* 2009;30:465-493. doi: 10.1210/er.2009-0006.
- 404 3. Pachman DR, Jones JM, Loprinzi CL. Management of menopause-associated vasomotor  
405 symptoms: current treatment options, challenges and future directions. *Int J Women's Health.*  
406 2010;2:123-135.
- 407 4. Freeman EW, Sammel MD, Sanders RJ. Risk of long-term hot flashes after natural  
408 menopause: evidence from the Penn Ovarian Aging Study cohort. *Menopause.* 2014;21:924-  
409 932. doi: 10.1097/GME.000000000000196.
- 410 5. Subbiah MT, Kessel B, Agrawal M, Rajan R, Abplanalp W, Rymaszewski Z. Antioxidant  
411 potential of specific estrogens on lipid peroxidation. *J Clin Endocrinol Metab.* 1993;77:1095-  
412 1097. doi:10.1210/jcem.77.4.8408459.
- 413 6. Kumar S, Lata K, Mukhopadhyay S, Mukherjee TK. Role of estrogen receptors in pro-  
414 oxidative and anti-oxidative actions of estrogens: A perspective. *Biochim Biophys Acta.*  
415 2010;1800:1127-1135. doi: 10.1016/j.bbagen.2010.04.011.
- 416 7. Doshi SB, Agarwal A. The role of oxidative stress in menopause. *J Mid-Life Health.*  
417 2013;4:140-146. doi: 10.4103/0976-7800.118990.
- 418 8. Sánchez-Rodríguez MA, Zacarías-Flores M, Arronte-Rosales A, Mendoza-Núñez VM.  
419 Menopause as a risk factor for oxidative stress. *Menopause.* 2012;19:361-367. doi:  
420 10.1097/GME.0b013e318229977d

- 421 9. Bonaccorsi G, Romani A, Cremonini E, Bergamini CM, Castaldini MC, Fila E, et al.  
422 Oxidative stress and menopause-related hot flashes may be independent events. *Taiwan J*  
423 *Obstet Gynecol.* 2015;54:290-293. doi: 10.1016/j.tjog.2014.09.009.
- 424 10. Sánchez-Rodríguez MA, Mendoza-Núñez VM, García-Sánchez A, González-González B,  
425 Rodríguez-Torres E, González-Obregón A. Valores de referencia de poblaciones senecta y  
426 adulta de la ciudad de México. *Parámetros bioquímicos y hematológicos. Acta Bioquim Clin*  
427 *Latinoam.* 1998;32:812-821.
- 428 11. Jentsch AM, Bachmann H, Fürst P, Biesalski HK. Improved analysis of malondialdehyde in  
429 human body fluids. *Free Radic Biol Med.* 1996;20:251-256.
- 430 12. Miller NJ. Nonvitamin plasma antioxidants. In: Armstrong D (Ed). *Free radical and*  
431 *antioxidant protocols.* New Jersey: Humana Press, 1998:285-297.
- 432 13. Remacle J, Lambert D, Raes M, Pigeolet E, Michiels C, Toussaint O. Importance of various  
433 antioxidant enzymes for cell stability. Confrontation between theoretical and experimental  
434 data. *Biochem J* 1992;286:41-46.
- 435 14. de Haan JB, Cristiano F, Iannello R, Kelner M, Kola I. Elevation in the ratio of Cu/Zn-  
436 superoxide dismutase to glutathione peroxidase leads to cellular senescence and this effect is  
437 mediated by hydrogen peroxide. *Hum Mol Genet* 1996;5:283-292.
- 438 15. de Haan JB, Crack PJ, Flentjar N, Iannello RC, Hertzog PJ, Kola I. An imbalance in  
439 antioxidant defense affects cellular function: the pathophysiological consequences of a  
440 reduction in antioxidant defense in the glutathione peroxidase-1 (Gpx1) knockout mouse.  
441 *Redox Rep.* 2003;8(2):69-79. doi:10.1179/135100003125001378.
- 442 16. Heinemann LA, Potthoff P, Schneider HP. International versions of the Menopause Rating  
443 Scale (MRS). *Health Qual Life Outcomes.* 2003;1:28. doi:10.1186/1477-7525-1-28.

- 444 17. Chedraui P, Aguirre W, Hidalgo L, Fayad L. Assessing menopausal symptoms among  
445 healthy middle aged women with the Menopause Rating Scale. *Maturitas*. 2007;57:271-278.  
446 doi:10.1016/j.maturitas.2007.01.009
- 447 18. Aedo S, Porcile A, Irribarra C. Calidad de vida relacionada con el climaterio en una  
448 población Chilena de mujeres saludables. *Rev Chil Obstet Ginecol*. 2006;71:402-409.
- 449 19. Zung WW. A rating instrument for anxiety disorders. *Psychosomatics*. 1971;12:371-379.  
450 doi:10.1016/s0033-3182(71)71479-0.
- 451 20. Olatunji BO, Deacon BJ, Abramowitz JS, Tolin DF. Dimensionality of somatic complaints:  
452 factor structure and psychometric properties of the Self-Rating Anxiety Scale. *J Anxiety*  
453 *Disord* 2006;20:543-561. doi: 10.1016/j.janxdis.2005.08.002
- 454 21. Zung WW, Richards CB, Short MJ. Self-rating depression scale in an outpatient clinic.  
455 Further validation on the SDS. *Arch Gen Psychiatry*. 1965;13:508-515.
- 456 22. Carroll BJ, Fielding J, Blashki TG. Depression rating scales: a critical review. *Arch Gen*  
457 *Psychiatry*. 1973;28:361-366.
- 458 23. Soldatos CR, Dikeos DG, Paparrigopoulos TJ. Athens Insomnia Scale: validation of an  
459 instrument based on ICD-10 criteria. *J Psychosom Res*. 2000;48:555-560.
- 460 24. Soldatos CR, Dikeos DG, Paparrigopoulos TJ. The diagnostic validity of the Athens  
461 Insomnia Scale. *J Psychosom Res*. 2003;55:263-267.
- 462 25. Avis NE, Brockwell S, Colvin A. A universal menopause syndrome? *Am J Med*  
463 2005;118:37S-46S. doi:10.1016/j.amjmed.2005.09.057
- 464 26. Sussman M, Trocio J, Best C, Mirkin S, Bushmakin AG, Yood R, et al. Prevalence of  
465 menopausal symptoms among mid-life women findings from electronic medical records.  
466 *BMC Women's Health*. 2015;15:58. doi: 10.1186/s12905-015-0217-y.

- 467 27. Biglia N, Cagnacci A, Gambacciani M, Lello S, Maffei S, Nappi RE. Vasomotor symptoms  
468 in menopause: a biomarker of cardiovascular disease risk and other chronic diseases?  
469 *Climacteric*. 2017;20:306-312. doi: 10.1080/13697137.2017.1315089
- 470 28. Ayers B, Hunter MS. Health-related quality of life of women with menopausal hot flushes  
471 and night sweats. *Climacteric*. 2013;16:235-239. doi: 10.3109/13697137.2012.688078
- 472 29. Halliwell B. Biochemistry of oxidative stress. *Biochem Soc Trans*. 2007;35(part 5):1147-  
473 1150. doi:10.1042/bst0351147.
- 474 30. Birben E, Sahiner UM, Sackesen C, Erzurum S, Kalayci O. Oxidative stress and antioxidant  
475 defense. *World Allergy Organ J*. 2012;5:9-19. doi: 10.1097/WOX.0b013e3182439613.
- 476 31. Özkaya E, Cakir E, Kara F, Okuyan E, Cakir C, Ustün G, et al. Impact of hot flashes and  
477 night sweats on carotid intima–media thickness and bone mineral density among  
478 postmenopausal women. *Int J Gynecol Obstet*. 2011;113:235-238. doi:  
479 10.1016/j.ijgo.2010.12.020.
- 480 32. Muka T, Oliver-Williams C, Colpani V, Kunutsor S, Chowdhury S, Chowdhury R, et al.  
481 Association of vasomotor and other menopausal symptoms with risk of cardiovascular  
482 disease: a systematic review and meta-analysis. *PLoS One*. 2016;11(6):e0157417. doi:  
483 10.1371/journal.pone.0157417.
- 484 33. Chen AF, Chen DD, Daiber A, Faraci FM, Li H, Rembold CM, et al. Free radical biology of  
485 the cardiovascular system. *Clin Sci*. 2012;123:73-91. doi: 10.1042/CS20110562.
- 486 34. Leal M, Díaz J, Serrano E, Abellán J, Carbonell L. Hormone replacement therapy for  
487 oxidative stress in postmenopausal women with hot flushes. *Obstet Gynecol*. 2000;95: 804-  
488 809.

- 489 35. Cagnacci A, Cannolette M, Palma F, Bellafronte M, Romani C, Palmieri B.. Relation  
490 between oxidative stress and climacteric symptoms in early postmenopausal women.  
491 Climacteric. 2015;18:631-636. doi: 10.3109/13697137.2014.999659.
- 492 36. Strehlow K, Rotter S, Wassmann S, Adam O, Grohé C, Laufs K, et al. Modulation of  
493 antioxidant enzyme expression and function by estrogen. Circ Res. 2003;93:170-177.  
494 doi:10.1161/01.res.0000082334.17947.11
- 495 37. Sánchez-Rodríguez MA, Martínez-Cruz M, Correa-Muñoz E, Mendoza-Núñez VM.  
496 Relationship between metabolic syndrome components and oxidative stress in elderly  
497 community-dwelling Mexicans. Ann Nutr Metab. 2010;56:302-307. doi: 10.1159/000309601.
- 498 38. Mendoza-Núñez VM, Rosado-Pérez J, Santiago-Osorio E, Ortiz R, Sánchez-Rodríguez MA,  
499 Galván-Duarte RE. Aging linked to type 2 diabetes increases oxidative stress and chronic  
500 inflammation. Rejuvenation Res. 2011;14:25-31. doi: 10.1089/rej.2010.1054.
- 501 39. Sánchez-Rodríguez MA, Castrejón-Delgado L, Zacarías-Flores M, Arronte-Rosales A,  
502 Mendoza-Núñez VM. Quality of life among post-menopausal women due to oxidative stress  
503 boosted by dysthymia and anxiety. BMC Women's Health. 2017;17:1. doi: 10.1007/s40618-  
504 017-0654-6.
- 505 40. Terauchi M, Hiramitsu S, Akiyoshi M, Owa Y, Kato K, Obayashi S, et al. Associations  
506 between anxiety, depression and insomnia in peri- and post-menopausal women. Maturitas.  
507 2012;72:61-65. doi: 10.1016/j.maturitas.2012.01.014.
- 508 41. Avis NE, Colvin A, Bromberger JT, Hess R, Matthews KA, Ory M, et al. Change in health-  
509 related quality of life over the menopausal transition in a multiethnic cohort of middle-aged  
510 women: study of Women's Health Across the Nation (SWAN). Menopause. 2009;16:860-  
511 869. doi: 10.1097/gme.0b013e3181a3cdaf.



- 512 42. Hachul de Campos H, Brandao LC, D'Almeida V, Grego BH, Bittencourt LR, Tufik S, et al.  
513 Sleep disturbances, oxidative stress and cardiovascular risk parameters in postmenopausal  
514 women complaining of insomnia. *Climacteric*. 2006;9:312-319. doi:  
515 10.1080/13697130600871947.
- 516 43. Grases G, Colum MA, Fernandez RA, Costa-Bauzá A, Grases F. Evidence of higher  
517 oxidative status in depression and anxiety. *Oxid Med Cell Longev*. 2014;2014:430216. doi:  
518 10.1155/2014/430216.
- 519 44. Shanafelt TD, Barton DL, Adjei AA, Loprinzi CL. Pathophysiology and treatment of hot  
520 flashes. *Mayo Clin Proc*. 2002;77:1207-1218. doi: 10.4065/77.11.1207.
- 521 45. Kronenberg F. Menopausal hot flashes: a review of physiology and biosociocultural  
522 perspective on methods of assessment. *J Nutr*. 2010;140:1380S-1385S. doi:  
523 10.3945/jn.109.120840.
- 524 46. Bortolato M, Chen K, Shih JC. Monoamine oxidase inactivation: from pathophysiology to  
525 therapeutics. *Adv Drug Deliv Rev*. 2008;60:1527-1533. doi: 10.1016/j.addr.2008.06.002.
- 526 47. Napolitano A, Manini P, d'Ischia M. Oxidation chemistry of catecholamines and neuronal  
527 degeneration: an update. *Curr Med Chem*. 2011;18:1832-1845.

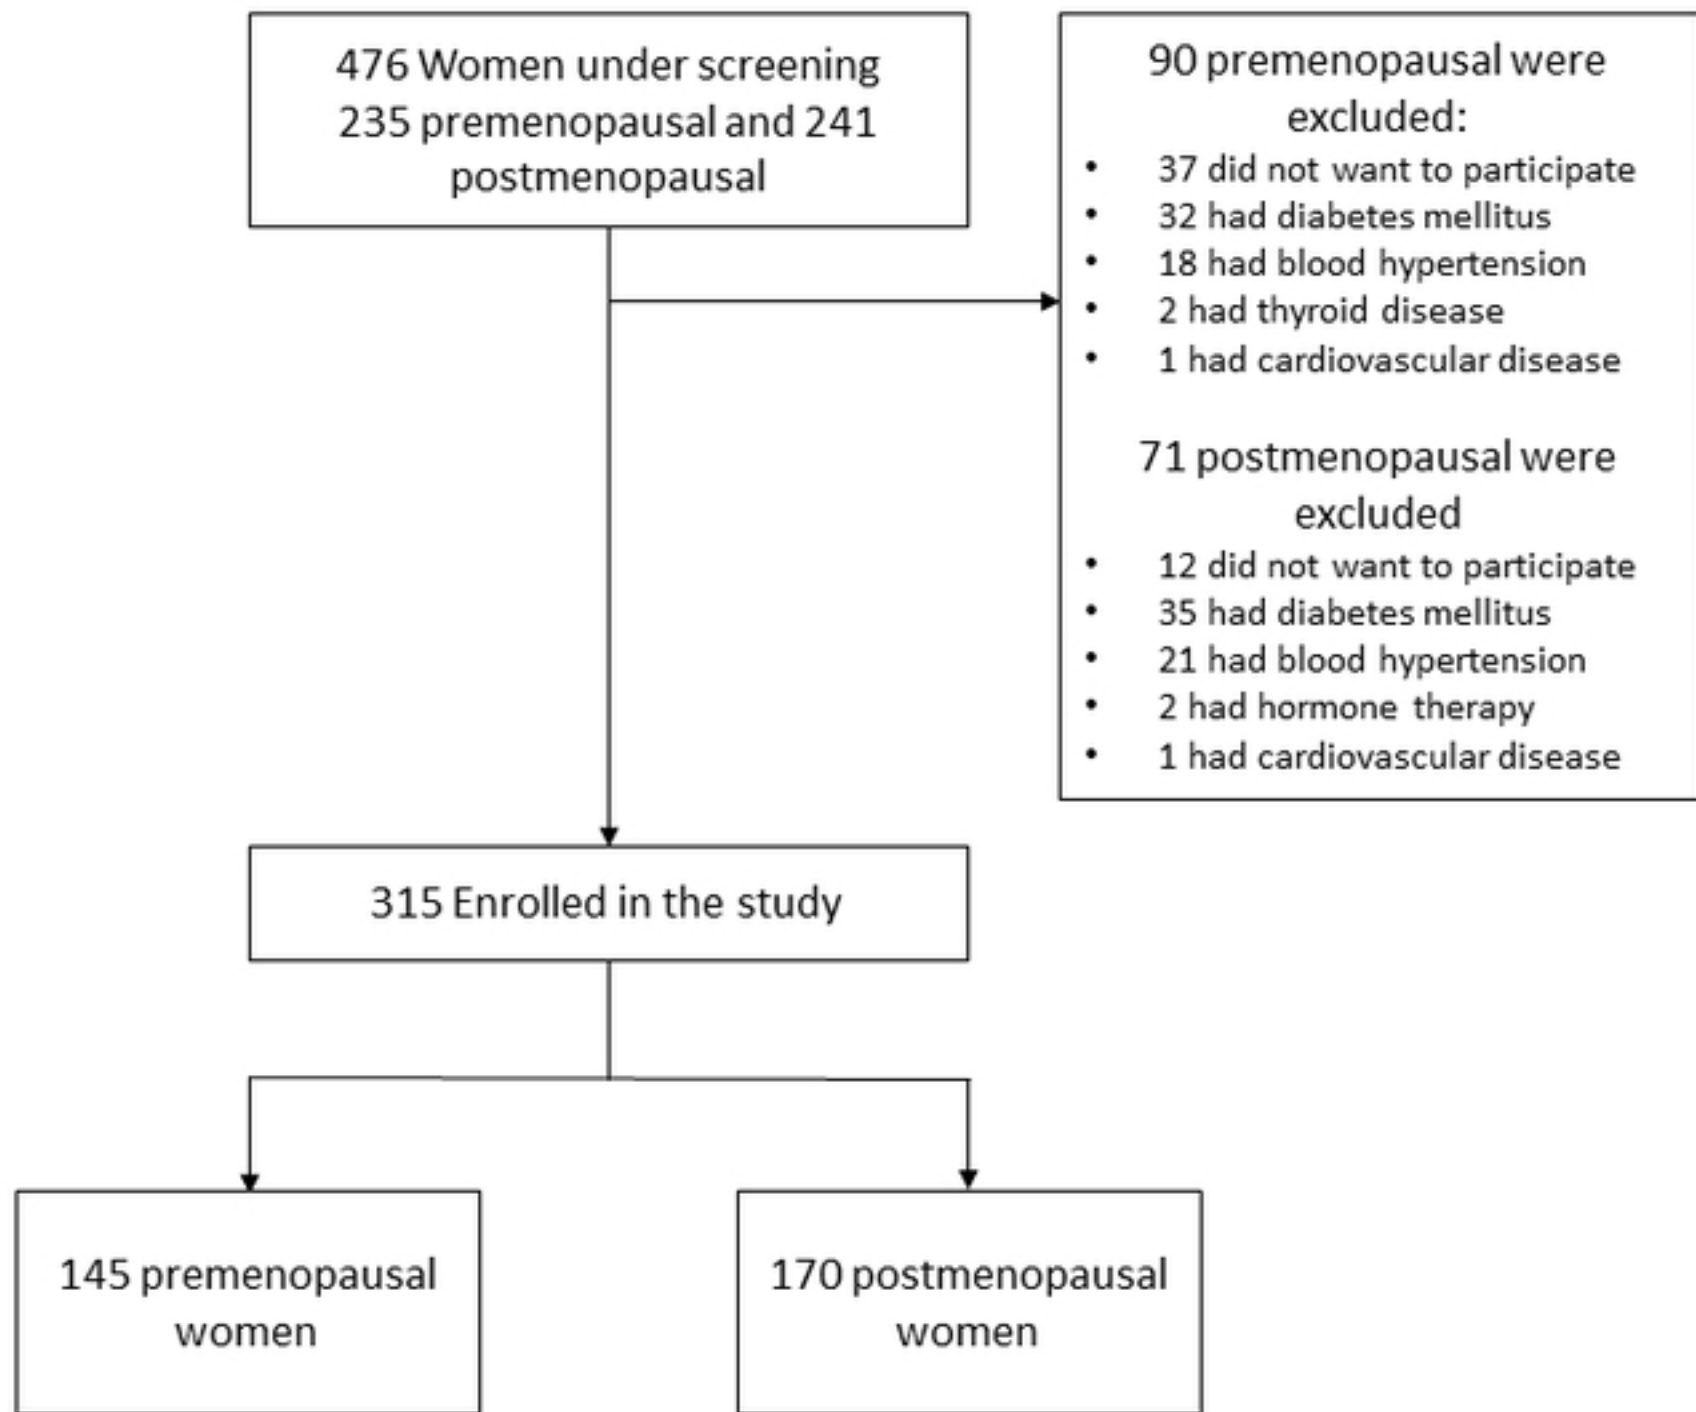

Figure
